# Supplementary material for: Innovative Ag–TiO2 Nanofibers with Excellent Photocatalytic and Antibacterial Actions
Source: MDPI journal article supplement (doi:10.3390/catal11101234), 2021-10-13
Supplement: s1 [file s1]

## Supporting Information

Article

# Innovative Ag–TiO<sub>2</sub> Nanofibers with Excellent Photocatalytic and Antibacterial Actions

Petronela Pascariu <sup>1,\*</sup>, Corneliu Cojocaru <sup>1</sup>, Anton Airinei <sup>1</sup>, Niculae Olaru <sup>1</sup>, Irina Rosca <sup>1</sup>, Emmanouel Koudoumas <sup>2</sup> and Mirela Petruta Suchea <sup>2,3,\*</sup>

<sup>1</sup> "Petru Poni" Institute of Macromolecular Chemistry, 41A Grigore Ghica Voda Alley, 700487, Iasi, Romania. ccojoc@gmail.com (C.C.); airineia@icmpp.ro (A.A.); nolaru@icmpp.ro (N.O.); rosca.irina@icmpp.ro (I.R.)

<sup>2</sup> Center of Materials Technology and Photonics, School of Engineering, Hellenic Mediterranean University, 71410 Heraklion, Crete, Greece. koudoumas@hmu.gr

<sup>3</sup> National Institute for Research and Development in Microtechnologies (IMT-Bucharest), Bucharest, 023573, Romania

\* Correspondence: domeneanu.petronela@icmpp.ro & pascariu\_petronela@yahoo.com (P.P.); mira.suchea@imt.ro & mirasuchea@hmu.gr (M.P.S.)

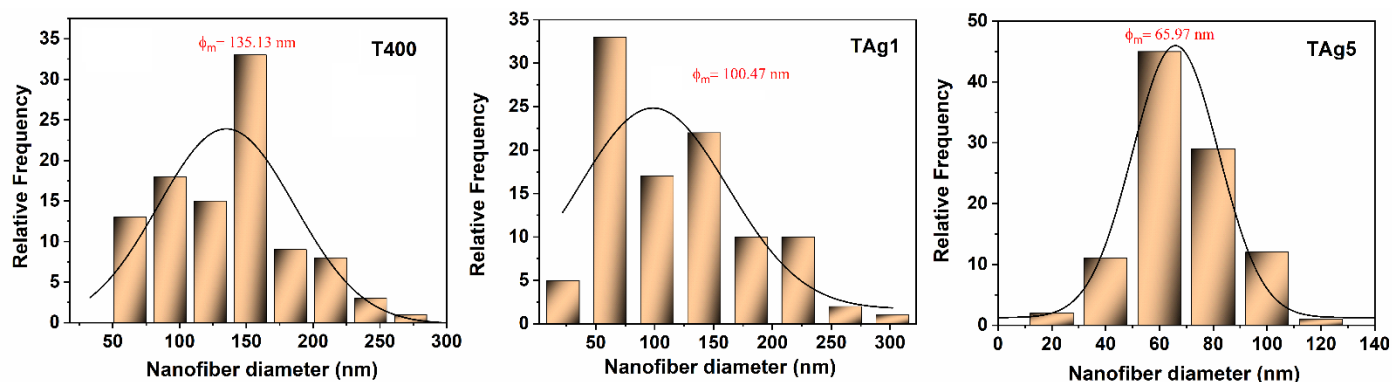

**Figure S1.** Histogram of fiber diameter distribution plotted from SEM images analysis of pure TiO<sub>2</sub> (T400) and Ag doped TiO<sub>2</sub> (TAg1 and TAg5).

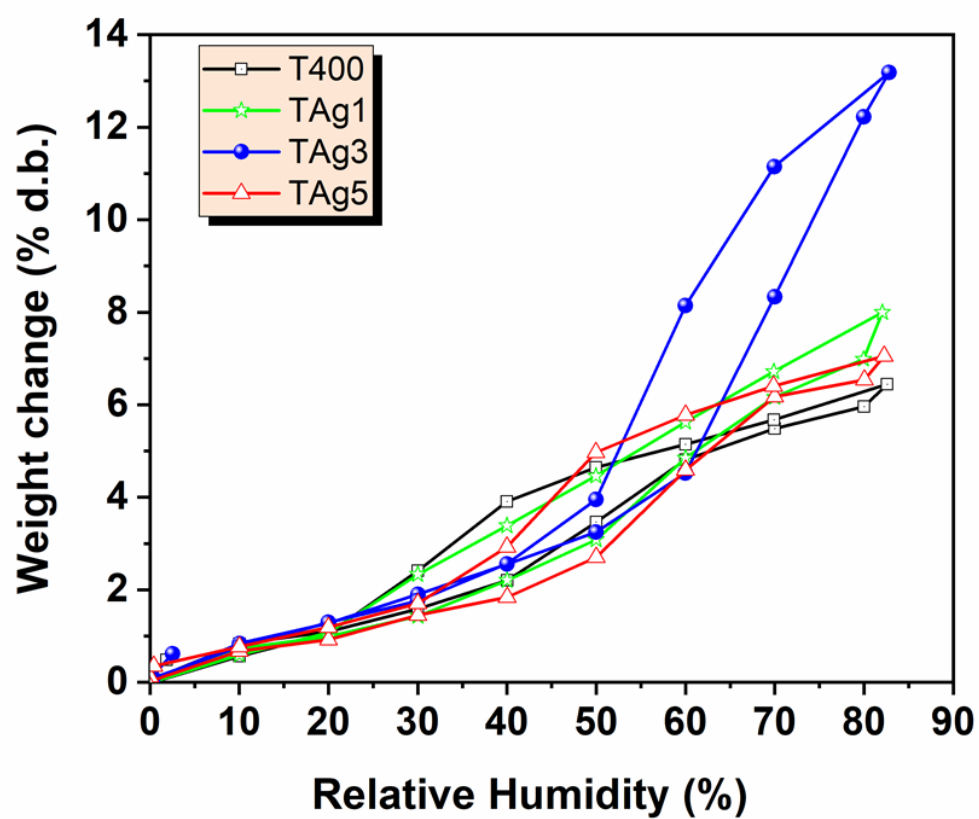

Figure S2. Dynamic vapor sorption isotherms for pure TiO<sub>2</sub> and Ag doped TiO<sub>2</sub> materials.

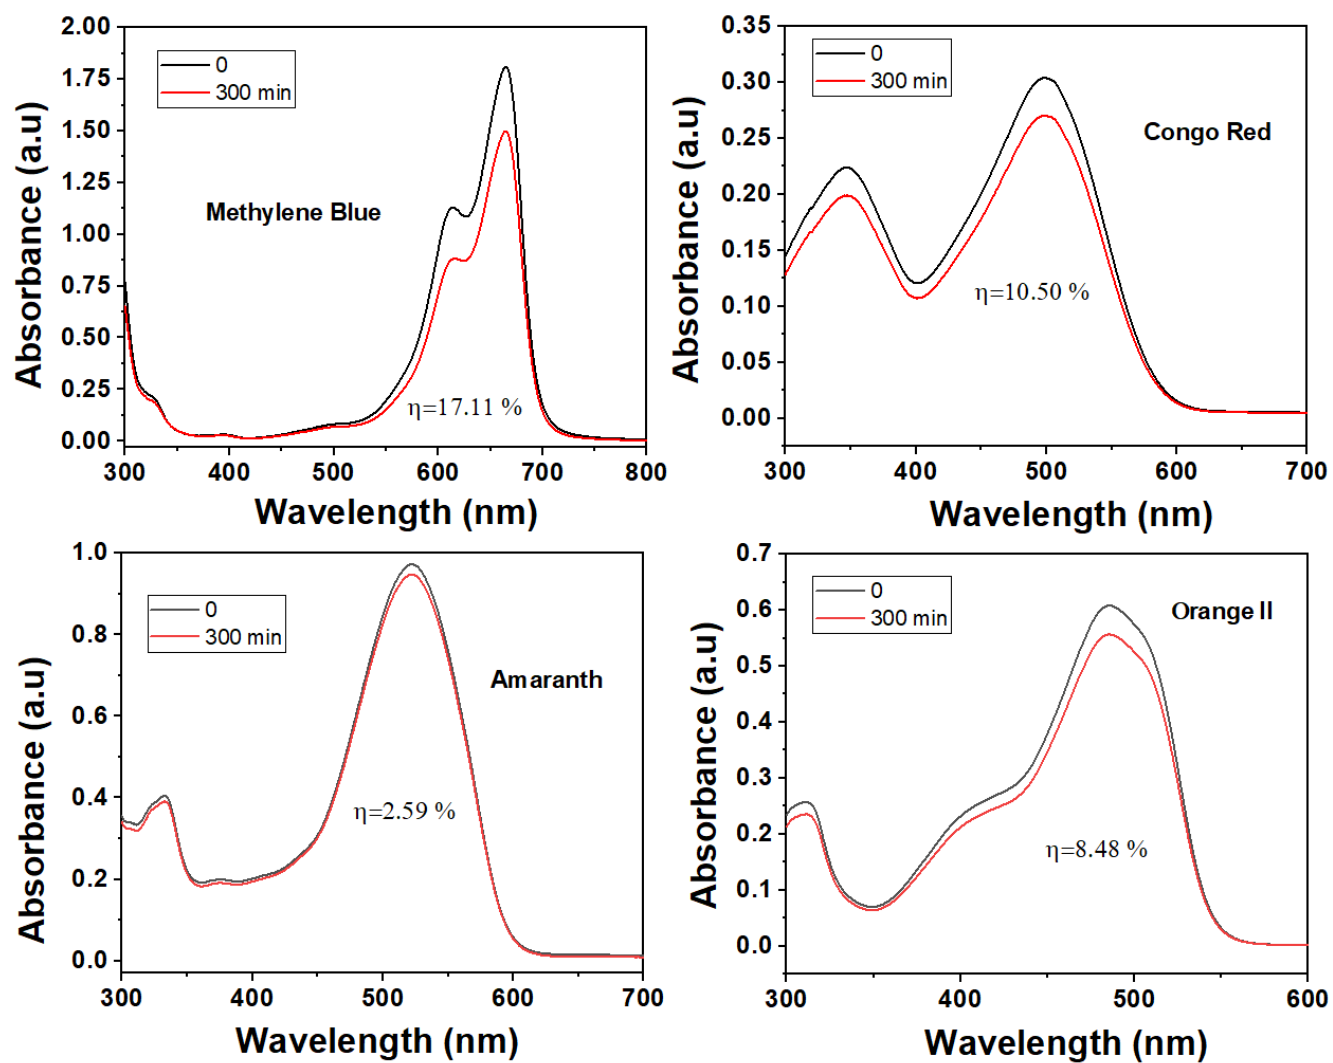

**Figure S3.** UV-VIS absorption spectra of the photolysis test for all 4 dyes performed under visible light irradiation for 300 minutes.

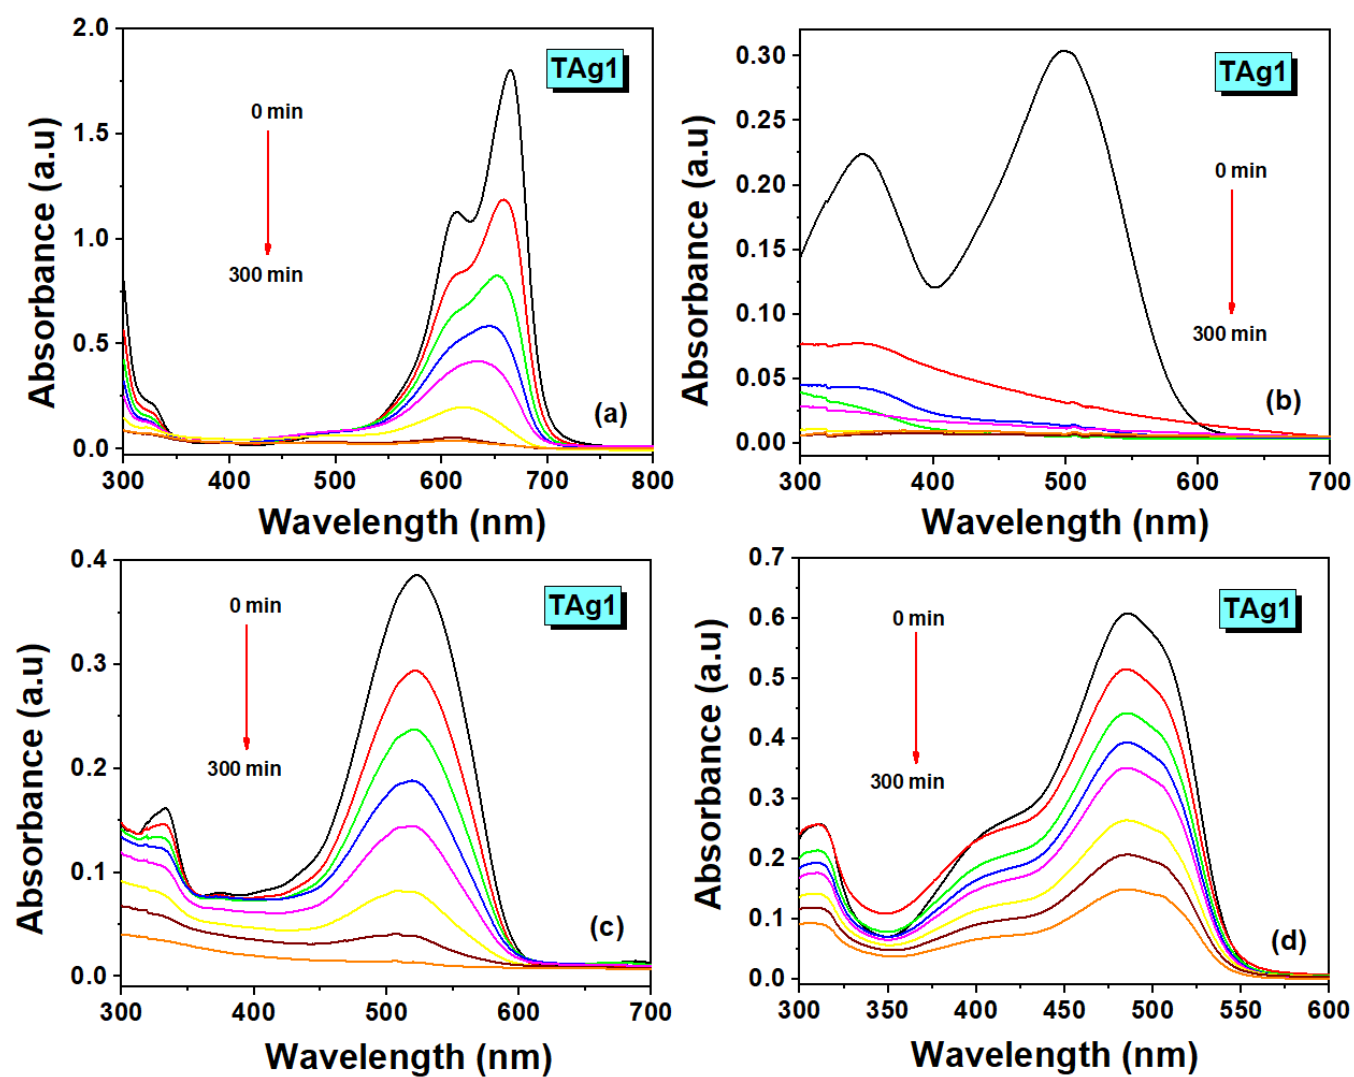

**Figure S4.** UV-VIS absorption spectra recorded for the degradation of (a) MB, (b) CR, (c) Amaranth and (d) Orange II dyes.

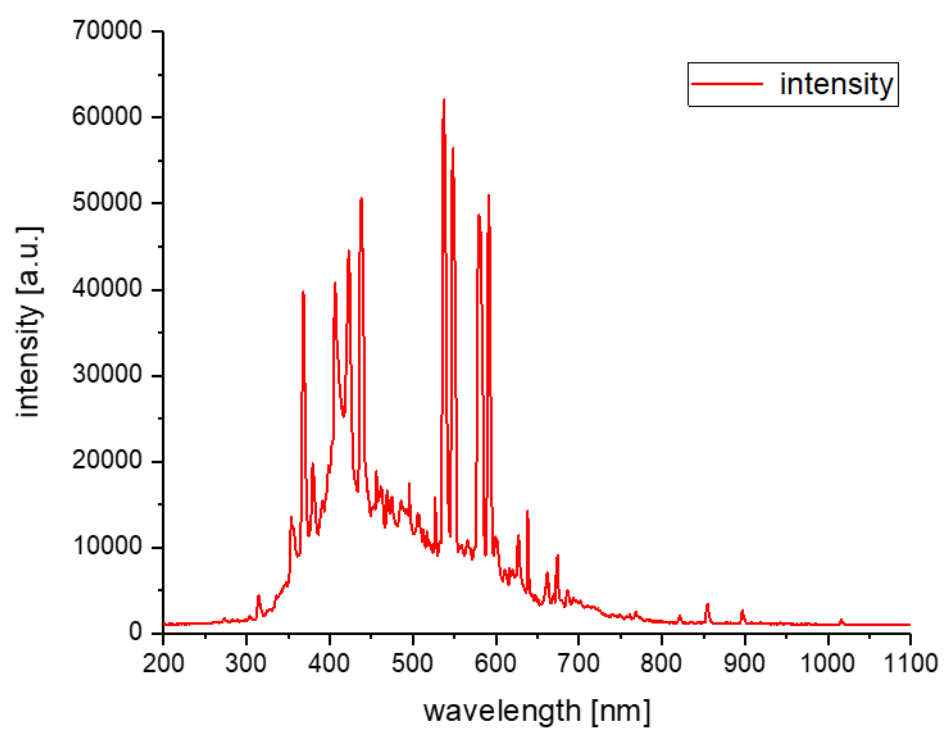

**Figure S5.** Lamp spectrum.
